# Supplementary material
Source: MDPI journal article supplement (https://www.mdpi.com/2624-8549/2/2/31)

# checkCIF/PLATON report

Structure factors have been supplied for datablock(s) dmwmsv6-73\_sq

THIS REPORT IS FOR GUIDANCE ONLY. IF USED AS PART OF A REVIEW PROCEDURE FOR PUBLICATION, IT SHOULD NOT REPLACE THE EXPERTISE OF AN EXPERIENCED CRYSTALLOGRAPHIC REFEREE.

No syntax errors found.      CIF dictionary      Interpreting this report

## Datablock: dmwmsv6-73\_sq

---

|                 |                            |                                  |
|-----------------|----------------------------|----------------------------------|
| Bond precision: | C-C = 0.0045 A             | Wavelength=0.68890               |
| Cell:           | a=32.85880(17)             | b=30.06718(13)      c=40.1053(2) |
|                 | alpha=90                   | beta=96.0585(5)      gamma=90    |
| Temperature:    | 100 K                      |                                  |
|                 | Calculated                 | Reported                         |
| Volume          | 39401.6(3)                 | 39401.6(3)                       |
| Space group     | C 2/c                      | C 1 2/c 1                        |
| Hall group      | -C 2yc                     | -C 2yc                           |
| Moiety formula  | 2(C336 H262 Co8 N72), C6   | C336 H262 Co8 N72,               |
|                 | Cl4 O2, 2(B2 F5), 14.34(B  | 3.584(B2 F8), B2 F5,             |
|                 | F4) [+ solve               | 0.25(C12 Cl8 O4)                 |
| Sum formula     | C678 H524 B18.34 Cl4 Co16  | C377 H416 B16 Cl2 Co8 F64        |
|                 | F67.36 N144 O2 [+ solvent] | N72 O39                          |
| Mr              | 13283.23                   | 8511.09                          |
| Dx, g cm-3      | 1.120                      | 1.435                            |
| Z               | 2                          | 4                                |
| Mu (mm-1)       | 0.378                      | 0.415                            |
| F000            | 13627.9                    | 17600.0                          |
| F000'           | 13644.80                   |                                  |
| h,k,lmax        | 47,43,58                   | 47,43,58                         |
| Nref            | 62835                      | 62714                            |
| Tmin,Tmax       |                            | 0.975,1.000                      |
| Tmin'           |                            |                                  |

Correction method= # Reported T Limits: Tmin=0.975 Tmax=1.000  
AbsCorr = EMPIRICAL

Data completeness= 0.998      Theta(max)= 29.947

R(reflections)= 0.0827( 36940)      wR2(reflections)= 0.3038( 62714)

S = 1.091      Npar= 2167

---

The following ALERTS were generated. Each ALERT has the format

**test-name\_ALERT\_alert-type\_alert-level.**

Click on the hyperlinks for more details of the test.

---

● **Alert level B**

|                   |                                                  |     |       |
|-------------------|--------------------------------------------------|-----|-------|
| PLAT250_ALERT_2_B | Large U3/U1 Ratio for Average U(i,j) Tensor .... | 4.5 | Note  |
| PLAT934_ALERT_3_B | Number of (Iobs-Icalc)/Sigma(W) > 10 Outliers .. | 4   | Check |

---

● **Alert level C**

|                   |                                                                      |       |        |
|-------------------|----------------------------------------------------------------------|-------|--------|
| PLAT084_ALERT_3_C | High wR2 Value (i.e. > 0.25) .....                                   | 0.30  | Report |
| PLAT094_ALERT_2_C | Ratio of Maximum / Minimum Residual Density ....                     | 2.39  | Report |
| PLAT260_ALERT_2_C | Large Average Ueq of Residue Including Cl23                          | 0.186 | Check  |
| PLAT260_ALERT_2_C | Large Average Ueq of Residue Including F92                           | 0.126 | Check  |
| PLAT260_ALERT_2_C | Large Average Ueq of Residue Including F22                           | 0.131 | Check  |
| PLAT260_ALERT_2_C | Large Average Ueq of Residue Including F32                           | 0.129 | Check  |
| PLAT260_ALERT_2_C | Large Average Ueq of Residue Including F42                           | 0.156 | Check  |
| PLAT790_ALERT_4_C | Centre of Gravity not Within Unit Cell: Resd. #<br>C336 H262 Co8 N72 | 1     | Note   |
| PLAT911_ALERT_3_C | Missing FCF Refl Between Thmin & STh/L= 0.600                        | 76    | Report |
| PLAT918_ALERT_3_C | Reflection(s) with I(obs) much Smaller I(calc) .                     | 7     | Check  |
| PLAT978_ALERT_2_C | Number C-C Bonds with Positive Residual Density.                     | 0     | Info   |

---

● **Alert level G**

FORMU01\_ALERT\_1\_G There is a discrepancy between the atom counts in the  
\_chemical\_formula\_sum and \_chemical\_formula\_moiety. This is  
usually due to the moiety formula being in the wrong format.  
Atom count from \_chemical\_formula\_sum: C377 H416 B16 Cl2 Co8 F64 N72  
Atom count from \_chemical\_formula\_moiety:C339 H262 B9.167999 Cl2 Co8 F

FORMU01\_ALERT\_2\_G There is a discrepancy between the atom counts in the  
\_chemical\_formula\_sum and the formula from the \_atom\_site\* data.  
Atom count from \_chemical\_formula\_sum:C377 H416 B16 Cl2 Co8 F64 N72 O3  
Atom count from the \_atom\_site data: C339 H262 B9.17 Cl2 Co8 F33.6799

ABSMU01\_ALERT\_1\_G Calculation of \_exptl\_absorpt\_correction\_mu  
not performed for this radiation type.

CELLZ01\_ALERT\_1\_G Difference between formula and atom\_site contents detected.

CELLZ01\_ALERT\_1\_G ALERT: Large difference may be due to a  
symmetry error - see SYMMG tests  
From the CIF: \_cell\_formula\_units\_Z 4  
From the CIF: \_chemical\_formula\_sum C377 H416 B16 Cl2 Co8 F64 N72 O39  
TEST: Compare cell contents of formula and atom\_site data

| atom | Z*formula | cif sites | diff   |
|------|-----------|-----------|--------|
| C    | 1508.00   | 1356.00   | 152.00 |
| H    | 1664.00   | 1048.00   | 616.00 |
| B    | 64.00     | 36.68     | 27.32  |
| Cl   | 8.00      | 8.00      | 0.00   |
| Co   | 32.00     | 32.00     | 0.00   |
| F    | 256.00    | 134.72    | 121.28 |
| N    | 288.00    | 288.00    | 0.00   |
| O    | 156.00    | 4.00      | 152.00 |

|                   |                                                  |      |              |
|-------------------|--------------------------------------------------|------|--------------|
| PLAT002_ALERT_2_G | Number of Distance or Angle Restraints on AtSite | 223  | Note         |
| PLAT003_ALERT_2_G | Number of Uiso or Uij Restrained non-H Atoms ... | 240  | Report       |
| PLAT014_ALERT_1_G | N.O.K. _shelx_fab_checksum Found in CIF .....    |      | Please Check |
| PLAT041_ALERT_1_G | Calc. and Reported SumFormula Strings Differ     |      | Please Check |
| PLAT042_ALERT_1_G | Calc. and Reported MoietyFormula Strings Differ  |      | Please Check |
| PLAT045_ALERT_1_G | Calculated and Reported Z Differ by a Factor ... | 0.50 | Check        |
| PLAT072_ALERT_2_G | SHELXL First Parameter in WGHT Unusually Large   | 0.18 | Report       |

|                   |                                                    |              |
|-------------------|----------------------------------------------------|--------------|
| PLAT092_ALERT_4_G | Check: Wavelength Given is not Cu,Ga,Mo,Ag,In Ka   | 0.68890 Ang. |
| PLAT142_ALERT_4_G | s.u. on b - Axis Small or Missing .....            | 0.00013 Ang. |
| PLAT143_ALERT_4_G | s.u. on c - Axis Small or Missing .....            | 0.00020 Ang. |
| PLAT171_ALERT_4_G | The CIF-Embedded .res File Contains EADP Records   | 3 Report     |
| PLAT172_ALERT_4_G | The CIF-Embedded .res File Contains DFIX Records   | 4 Report     |
| PLAT174_ALERT_4_G | The CIF-Embedded .res File Contains FLAT Records   | 4 Report     |
| PLAT175_ALERT_4_G | The CIF-Embedded .res File Contains SAME Records   | 30 Report    |
| PLAT176_ALERT_4_G | The CIF-Embedded .res File Contains SADI Records   | 1 Report     |
| PLAT178_ALERT_4_G | The CIF-Embedded .res File Contains SIMU Records   | 1 Report     |
| PLAT187_ALERT_4_G | The CIF-Embedded .res File Contains RIGU Records   | 1 Report     |
| PLAT244_ALERT_4_G | Low 'Solvent' Ueq as Compared to Neighbors of      | B11 Check    |
| PLAT244_ALERT_4_G | Low 'Solvent' Ueq as Compared to Neighbors of      | B21 Check    |
| PLAT300_ALERT_4_G | Atom Site Occupancy of Cl23 Constrained at         | 0.25 Check   |
| PLAT300_ALERT_4_G | Atom Site Occupancy of Cl24 Constrained at         | 0.25 Check   |
| PLAT300_ALERT_4_G | Atom Site Occupancy of Cl25 Constrained at         | 0.25 Check   |
| PLAT300_ALERT_4_G | Atom Site Occupancy of Cl26 Constrained at         | 0.25 Check   |
| PLAT300_ALERT_4_G | Atom Site Occupancy of O21G Constrained at         | 0.25 Check   |
| PLAT300_ALERT_4_G | Atom Site Occupancy of O22G Constrained at         | 0.25 Check   |
| PLAT300_ALERT_4_G | Atom Site Occupancy of Cl1G Constrained at         | 0.25 Check   |
| PLAT300_ALERT_4_G | Atom Site Occupancy of Cl2G Constrained at         | 0.25 Check   |
| PLAT300_ALERT_4_G | Atom Site Occupancy of Cl3G Constrained at         | 0.25 Check   |
| PLAT300_ALERT_4_G | Atom Site Occupancy of Cl4G Constrained at         | 0.25 Check   |
| PLAT300_ALERT_4_G | Atom Site Occupancy of Cl5G Constrained at         | 0.25 Check   |
| PLAT300_ALERT_4_G | Atom Site Occupancy of Cl6G Constrained at         | 0.25 Check   |
| PLAT302_ALERT_4_G | Anion/Solvent/Minor-Residue Disorder (Resd 2 )     | 100% Note    |
| PLAT302_ALERT_4_G | Anion/Solvent/Minor-Residue Disorder (Resd 6 )     | 100% Note    |
| PLAT302_ALERT_4_G | Anion/Solvent/Minor-Residue Disorder (Resd 7 )     | 100% Note    |
| PLAT304_ALERT_4_G | Non-Integer Number of Atoms in ..... Resd 6        | 4.24 Check   |
| PLAT304_ALERT_4_G | Non-Integer Number of Atoms in ..... Resd 7        | 3.68 Check   |
| PLAT343_ALERT_2_G | Unusual sp? Angle Range in Main Residue for        | C24D Check   |
| PLAT432_ALERT_2_G | Short Inter X...Y Contact Cl24 ..C53F              | 3.06 Ang.    |
|                   | x,y,z =                                            | 1_555 Check  |
| PLAT432_ALERT_2_G | Short Inter X...Y Contact Cl24 ..C54F              | 3.18 Ang.    |
|                   | x,y,z =                                            | 1_555 Check  |
| PLAT606_ALERT_4_G | VERY LARGE Solvent Accessible VOID(S) in Structure | ! Info       |
| PLAT779_ALERT_4_G | Suspect or Irrelevant (Bond) Angle(s) in CIF . #   | 741 Check    |
|                   | B91 -F93 -B91 1.555 1.555 2.856                    | 38.50 Deg.   |
| PLAT779_ALERT_4_G | Suspect or Irrelevant (Bond) Angle(s) in CIF . #   | 742 Check    |
|                   | B91 -F94 -B91 2.856 1.555 1.555                    | 34.80 Deg.   |
| PLAT789_ALERT_4_G | Atoms with Negative _atom_site_disorder_group #    | 12 Check     |
| PLAT790_ALERT_4_G | Centre of Gravity not Within Unit Cell: Resd. #    | 2 Note       |
|                   | C6 Cl4 O2                                          |              |
| PLAT790_ALERT_4_G | Centre of Gravity not Within Unit Cell: Resd. #    | 3 Note       |
|                   | B2 F5                                              |              |
| PLAT790_ALERT_4_G | Centre of Gravity not Within Unit Cell: Resd. #    | 4 Note       |
|                   | B F4                                               |              |
| PLAT790_ALERT_4_G | Centre of Gravity not Within Unit Cell: Resd. #    | 5 Note       |
|                   | B F4                                               |              |
| PLAT790_ALERT_4_G | Centre of Gravity not Within Unit Cell: Resd. #    | 6 Note       |
|                   | B F4                                               |              |
| PLAT790_ALERT_4_G | Centre of Gravity not Within Unit Cell: Resd. #    | 7 Note       |
|                   | B F4                                               |              |
| PLAT794_ALERT_5_G | Tentative Bond Valency for Co1 (II) .              | 1.53 Info    |
| PLAT794_ALERT_5_G | Tentative Bond Valency for Co2 (II) .              | 1.54 Info    |
| PLAT794_ALERT_5_G | Tentative Bond Valency for Co3 (II) .              | 1.52 Info    |
| PLAT794_ALERT_5_G | Tentative Bond Valency for Co4 (II) .              | 1.50 Info    |
| PLAT802_ALERT_4_G | CIF Input Record(s) with more than 80 Characters   | 8 Info       |
| PLAT860_ALERT_3_G | Number of Least-Squares Restraints .....           | 5560 Note    |
| PLAT869_ALERT_4_G | ALERTS Related to the Use of SQUEEZE Suppressed    | ! Info       |
| PLAT883_ALERT_1_G | No Info/Value for _atom_sites_solution_primary .   | Please Do !  |
| PLAT910_ALERT_3_G | Missing # of FCF Reflection(s) Below Theta(Min).   | 2 Note       |
| PLAT912_ALERT_4_G | Missing # of FCF Reflections Above STh/L= 0.600    | 44 Note      |

|                   |                                                  |        |       |
|-------------------|--------------------------------------------------|--------|-------|
| PLAT913_ALERT_3_G | Missing # of Very Strong Reflections in FCF .... | 2      | Note  |
| PLAT933_ALERT_2_G | Number of OMIT Records in Embedded .res File ... | 36     | Note  |
| PLAT984_ALERT_1_G | The Co-f' = 0.3538 Deviates from the B&C-Value   | 0.3480 | Check |
| PLAT985_ALERT_1_G | The Co-f" = 0.9121 Deviates from the B&C-Value   | 0.9239 | Check |

---

0 **ALERT level A** = Most likely a serious problem - resolve or explain  
 2 **ALERT level B** = A potentially serious problem, consider carefully  
 11 **ALERT level C** = Check. Ensure it is not caused by an omission or oversight  
 68 **ALERT level G** = General information/check it is not something unexpected

11 ALERT type 1 CIF construction/syntax error, inconsistent or missing data  
 16 ALERT type 2 Indicator that the structure model may be wrong or deficient  
 7 ALERT type 3 Indicator that the structure quality may be low  
 43 ALERT type 4 Improvement, methodology, query or suggestion  
 4 ALERT type 5 Informative message, check

---

## Validation response form

Please find below a validation response form (VRF) that can be filled in and pasted into your CIF.

```

# start Validation Reply Form
_vrf_PLAT250_dmwmvsv6-73_sq
;
PROBLEM: Large U3/U1 Ratio for Average U(i,j) Tensor ....      4.5 Note
RESPONSE: ...
;
_vrf_PLAT934_dmwmvsv6-73_sq
;
PROBLEM: Number of (Iobs-Icalc)/Sigma(W) > 10 Outliers ..      4 Check
RESPONSE: ...
;
# end Validation Reply Form

```

---

It is advisable to attempt to resolve as many as possible of the alerts in all categories. Often the minor alerts point to easily fixed oversights, errors and omissions in your CIF or refinement strategy, so attention to these fine details can be worthwhile. In order to resolve some of the more serious problems it may be necessary to carry out additional measurements or structure refinements. However, the purpose of your study may justify the reported deviations and the more serious of these should normally be commented upon in the discussion or experimental section of a paper or in the "special\_details" fields of the CIF. checkCIF was carefully designed to identify outliers and unusual parameters, but every test has its limitations and alerts that are not important in a particular case may appear. Conversely, the absence of alerts does not guarantee there are no aspects of the results needing attention. It is up to the individual to critically assess their own results and, if necessary, seek expert advice.

### **Publication of your CIF in IUCr journals**

A basic structural check has been run on your CIF. These basic checks will be run on all CIFs submitted for publication in IUCr journals (*Acta Crystallographica*, *Journal of Applied Crystallography*, *Journal of Synchrotron Radiation*); however, if you intend to submit to *Acta Crystallographica Section C* or *E* or *IUCrData*, you should make sure that full publication checks are run on the final version of your CIF prior to submission.

### **Publication of your CIF in other journals**

Please refer to the *Notes for Authors* of the relevant journal for any special instructions relating to CIF submission.

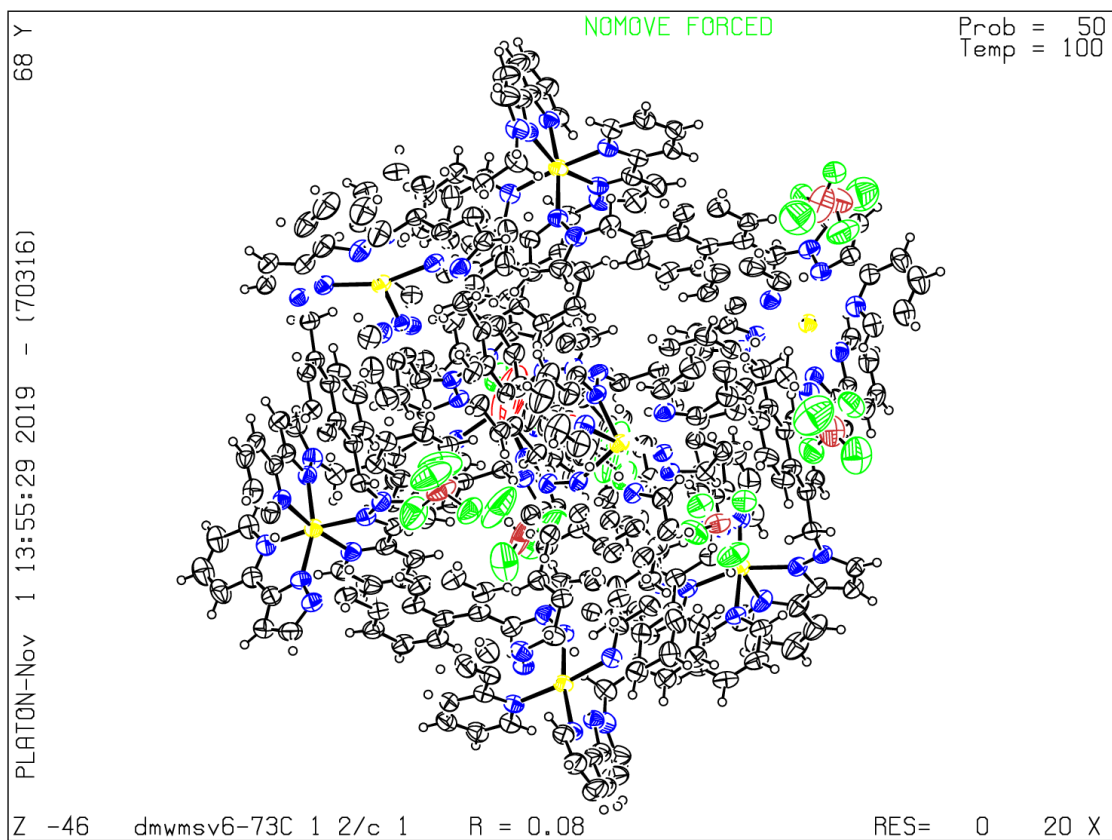

Supplement: s1 [file s1]
