# Supplementary material
Source: MDPI journal article supplement (https://www.mdpi.com/2624-8549/2/2/31)

# checkCIF/PLATON report

Structure factors have been supplied for datablock(s) dmwmsv6-45\_sq

THIS REPORT IS FOR GUIDANCE ONLY. IF USED AS PART OF A REVIEW PROCEDURE FOR PUBLICATION, IT SHOULD NOT REPLACE THE EXPERTISE OF AN EXPERIENCED CRYSTALLOGRAPHIC REFEREE.

No syntax errors found.      CIF dictionary      Interpreting this report

## Datablock: dmwmsv6-45\_sq

---

Bond precision:    C-C = 0.0035 A

Wavelength=0.68890

Cell:                a=33.04569(13)      b=30.13654(16)      c=39.97965(19)  
                      alpha=90                beta=96.4337(4)      gamma=90  
Temperature:      100 K

|                | Calculated                                                            | Reported                                              |
|----------------|-----------------------------------------------------------------------|-------------------------------------------------------|
| Volume         | 39564.3(3)                                                            | 39564.3(2)                                            |
| Space group    | C 2/c                                                                 | C 1 2/c 1                                             |
| Hall group     | -C 2yc                                                                | -C 2yc                                                |
| Moiety formula | 2(C336 H264 Co8 N72),<br>2(C10 H8 O3), 29(B F4),<br>10(C H3 O) [+ sol | C336 H264 Co8 N72, 16(B<br>F4), 30(C H4 O), C10 H8 O3 |
| Sum formula    | C702 H574 B29 Co16 F116<br>N144 O16 [+ solvent]                       | C376 H392 B16 Co8 F64 N72<br>O33                      |
| Mr             | 14743.46                                                              | 8307.99                                               |
| Dx,g cm-3      | 1.238                                                                 | 1.395                                                 |
| Z              | 2                                                                     | 4                                                     |
| Mu (mm-1)      | 0.379                                                                 | 0.398                                                 |
| F000           | 15086.0                                                               | 17152.0                                               |
| F000'          | 15103.66                                                              |                                                       |
| h,k,lmax       | 47,43,57                                                              | 47,43,57                                              |
| Nref           | 63071                                                                 | 62978                                                 |
| Tmin,Tmax      |                                                                       | 0.987,1.000                                           |
| Tmin'          |                                                                       |                                                       |

Correction method= # Reported T Limits: Tmin=0.987 Tmax=1.000  
AbsCorr = EMPIRICAL

Data completeness= 0.999

Theta(max)= 29.947

R(reflections)= 0.0719( 42192)

wR2(reflections)= 0.2596( 62978)

S = 1.079

Npar= 2517

---

The following ALERTS were generated. Each ALERT has the format

**test-name\_ALERT\_alert-type\_alert-level.**

Click on the hyperlinks for more details of the test.

---

### ● Alert level C

|                   |                                                  |       |        |
|-------------------|--------------------------------------------------|-------|--------|
| PLAT084_ALERT_3_C | High wR2 Value (i.e. > 0.25) .....               | 0.26  | Report |
| PLAT214_ALERT_2_C | Atom F64 (Anion/Solvent) ADP max/min Ratio       | 4.3   | prolat |
| PLAT250_ALERT_2_C | Large U3/U1 Ratio for Average U(i,j) Tensor .... | 2.2   | Note   |
| PLAT260_ALERT_2_C | Large Average Ueq of Residue Including O16G      | 0.195 | Check  |
| PLAT260_ALERT_2_C | Large Average Ueq of Residue Including F72       | 0.123 | Check  |
| PLAT260_ALERT_2_C | Large Average Ueq of Residue Including F82A      | 0.149 | Check  |
| PLAT260_ALERT_2_C | Large Average Ueq of Residue Including O11S      | 0.104 | Check  |
| PLAT309_ALERT_2_C | Single Bonded Oxygen (C-O > 1.3 Ang) .....       | 011S  | Check  |
| PLAT309_ALERT_2_C | Single Bonded Oxygen (C-O > 1.3 Ang) .....       | 021S  | Check  |
| PLAT309_ALERT_2_C | Single Bonded Oxygen (C-O > 1.3 Ang) .....       | 031S  | Check  |
| PLAT309_ALERT_2_C | Single Bonded Oxygen (C-O > 1.3 Ang) .....       | 041S  | Check  |
| PLAT431_ALERT_2_C | Short Inter HL..A Contact F23 ..031S .           | 2.84  | Ang.   |
|                   | x,y,z = 1_555                                    |       | Check  |
| PLAT911_ALERT_3_C | Missing FCF Refl Between Thmin & STh/L= 0.600    | 72    | Report |
| PLAT913_ALERT_3_C | Missing # of Very Strong Reflections in FCF .... | 5     | Note   |
| PLAT918_ALERT_3_C | Reflection(s) with I(obs) much Smaller I(calc) . | 9     | Check  |
| PLAT975_ALERT_2_C | Check Calcd Resid. Dens. 0.73A From O31S         | 1.39  | eA-3   |
| PLAT978_ALERT_2_C | Number C-C Bonds with Positive Residual Density. | 0     | Info   |

---

### ● Alert level G

FORMU01\_ALERT\_2\_G There is a discrepancy between the atom counts in the  
\_chemical\_formula\_sum and the formula from the \_atom\_site\* data.  
Atom count from \_chemical\_formula\_sum: C376 H392 B16 Co8 F64 N72 O33  
Atom count from the \_atom\_site data: C351 H287 B14.5 Co8 F58 N72 O8

ABSMU01\_ALERT\_1\_G Calculation of \_exptl\_absorpt\_correction\_mu  
not performed for this radiation type.

CELLZ01\_ALERT\_1\_G Difference between formula and atom\_site contents detected.

CELLZ01\_ALERT\_1\_G ALERT: Large difference may be due to a  
symmetry error - see SYMMG tests  
From the CIF: \_cell\_formula\_units\_Z 4  
From the CIF: \_chemical\_formula\_sum C376 H392 B16 Co8 F64 N72 O33  
TEST: Compare cell contents of formula and atom\_site data

| atom | Z*formula | cif sites | diff   |
|------|-----------|-----------|--------|
| C    | 1504.00   | 1404.00   | 100.00 |
| H    | 1568.00   | 1148.00   | 420.00 |
| B    | 64.00     | 58.00     | 6.00   |
| Co   | 32.00     | 32.00     | 0.00   |
| F    | 256.00    | 232.00    | 24.00  |
| N    | 288.00    | 288.00    | 0.00   |
| O    | 132.00    | 32.00     | 100.00 |

|                   |                                                  |         |              |
|-------------------|--------------------------------------------------|---------|--------------|
| PLAT002_ALERT_2_G | Number of Distance or Angle Restraints on AtSite | 251     | Note         |
| PLAT003_ALERT_2_G | Number of Uiso or Uij Restrained non-H Atoms ... | 279     | Report       |
| PLAT014_ALERT_1_G | N.O.K. _shelx_fab_checksum Found in CIF .....    |         | Please Check |
| PLAT041_ALERT_1_G | Calc. and Reported SumFormula Strings Differ     |         | Please Check |
| PLAT042_ALERT_1_G | Calc. and Reported MoietyFormula Strings Differ  |         | Please Check |
| PLAT045_ALERT_1_G | Calculated and Reported Z Differ by a Factor ... | 0.50    | Check        |
| PLAT072_ALERT_2_G | SHELXL First Parameter in WGHT Unusually Large   | 0.17    | Report       |
| PLAT092_ALERT_4_G | Check: Wavelength Given is not Cu,Ga,Mo,Ag,In Ka | 0.68890 | Ang.         |
| PLAT142_ALERT_4_G | s.u. on b - Axis Small or Missing .....          | 0.00016 | Ang.         |
| PLAT143_ALERT_4_G | s.u. on c - Axis Small or Missing .....          | 0.00019 | Ang.         |
| PLAT145_ALERT_4_G | s.u. on beta Small or Missing .....              | 0.0004  | Degree       |
| PLAT172_ALERT_4_G | The CIF-Embedded .res File Contains DFIX Records | 3       | Report       |

|                   |                                                  |            |
|-------------------|--------------------------------------------------|------------|
| PLAT175_ALERT_4_G | The CIF-Embedded .res File Contains SAME Records | 36 Report  |
| PLAT178_ALERT_4_G | The CIF-Embedded .res File Contains SIMU Records | 2 Report   |
| PLAT187_ALERT_4_G | The CIF-Embedded .res File Contains RIGU Records | 1 Report   |
| PLAT244_ALERT_4_G | Low Solvent Ueq as Compared to Neighbors of      | B11 Check  |
| PLAT244_ALERT_4_G | Low Solvent Ueq as Compared to Neighbors of      | B21 Check  |
| PLAT244_ALERT_4_G | Low Solvent Ueq as Compared to Neighbors of      | B31 Check  |
| PLAT244_ALERT_4_G | Low Solvent Ueq as Compared to Neighbors of      | B41 Check  |
| PLAT300_ALERT_4_G | Atom Site Occupancy of O16G Constrained at       | 0.5 Check  |
| PLAT300_ALERT_4_G | Atom Site Occupancy of O17G Constrained at       | 0.5 Check  |
| PLAT300_ALERT_4_G | Atom Site Occupancy of O25G Constrained at       | 0.5 Check  |
| PLAT300_ALERT_4_G | Atom Site Occupancy of Cl1G Constrained at       | 0.5 Check  |
| PLAT300_ALERT_4_G | Atom Site Occupancy of Cl2G Constrained at       | 0.5 Check  |
| PLAT300_ALERT_4_G | Atom Site Occupancy of Cl3G Constrained at       | 0.5 Check  |
| PLAT300_ALERT_4_G | Atom Site Occupancy of Cl4G Constrained at       | 0.5 Check  |
| PLAT300_ALERT_4_G | Atom Site Occupancy of Cl5G Constrained at       | 0.5 Check  |
| PLAT300_ALERT_4_G | Atom Site Occupancy of C21G Constrained at       | 0.5 Check  |
| PLAT300_ALERT_4_G | Atom Site Occupancy of C22G Constrained at       | 0.5 Check  |
| PLAT300_ALERT_4_G | Atom Site Occupancy of C23G Constrained at       | 0.5 Check  |
| PLAT300_ALERT_4_G | Atom Site Occupancy of C24G Constrained at       | 0.5 Check  |
| PLAT300_ALERT_4_G | Atom Site Occupancy of C26G Constrained at       | 0.5 Check  |
| PLAT300_ALERT_4_G | Atom Site Occupancy of H12G Constrained at       | 0.5 Check  |
| PLAT300_ALERT_4_G | Atom Site Occupancy of H13G Constrained at       | 0.5 Check  |
| PLAT300_ALERT_4_G | Atom Site Occupancy of H21G Constrained at       | 0.5 Check  |
| PLAT300_ALERT_4_G | Atom Site Occupancy of H22G Constrained at       | 0.5 Check  |
| PLAT300_ALERT_4_G | Atom Site Occupancy of H24G Constrained at       | 0.5 Check  |
| PLAT300_ALERT_4_G | Atom Site Occupancy of H26M Constrained at       | 0.5 Check  |
| PLAT300_ALERT_4_G | Atom Site Occupancy of H26N Constrained at       | 0.5 Check  |
| PLAT300_ALERT_4_G | Atom Site Occupancy of H26O Constrained at       | 0.5 Check  |
| PLAT300_ALERT_4_G | Atom Site Occupancy of F94 Constrained at        | 0.5 Check  |
| PLAT300_ALERT_4_G | Atom Site Occupancy of B91 Constrained at        | 0.5 Check  |
| PLAT300_ALERT_4_G | Atom Site Occupancy of F52 Constrained at        | 0.5 Check  |
| PLAT300_ALERT_4_G | Atom Site Occupancy of F53 Constrained at        | 0.5 Check  |
| PLAT300_ALERT_4_G | Atom Site Occupancy of F54 Constrained at        | 0.5 Check  |
| PLAT300_ALERT_4_G | Atom Site Occupancy of F55 Constrained at        | 0.5 Check  |
| PLAT300_ALERT_4_G | Atom Site Occupancy of B51 Constrained at        | 0.5 Check  |
| PLAT300_ALERT_4_G | Atom Site Occupancy of F72 Constrained at        | 0.75 Check |
| PLAT300_ALERT_4_G | Atom Site Occupancy of F73 Constrained at        | 0.75 Check |
| PLAT300_ALERT_4_G | Atom Site Occupancy of F74 Constrained at        | 0.75 Check |
| PLAT300_ALERT_4_G | Atom Site Occupancy of F75 Constrained at        | 0.75 Check |
| PLAT300_ALERT_4_G | Atom Site Occupancy of B71 Constrained at        | 0.75 Check |
| PLAT300_ALERT_4_G | Atom Site Occupancy of O11S Constrained at       | 0.75 Check |
| PLAT300_ALERT_4_G | Atom Site Occupancy of Cl2S Constrained at       | 0.75 Check |
| PLAT300_ALERT_4_G | Atom Site Occupancy of H12A Constrained at       | 0.75 Check |
| PLAT300_ALERT_4_G | Atom Site Occupancy of H12B Constrained at       | 0.75 Check |
| PLAT300_ALERT_4_G | Atom Site Occupancy of H12C Constrained at       | 0.75 Check |
| PLAT300_ALERT_4_G | Atom Site Occupancy of O21S Constrained at       | 0.75 Check |
| PLAT300_ALERT_4_G | Atom Site Occupancy of C22S Constrained at       | 0.75 Check |
| PLAT300_ALERT_4_G | Atom Site Occupancy of H22A Constrained at       | 0.75 Check |
| PLAT300_ALERT_4_G | Atom Site Occupancy of H22B Constrained at       | 0.75 Check |
| PLAT300_ALERT_4_G | Atom Site Occupancy of H22C Constrained at       | 0.75 Check |
| PLAT300_ALERT_4_G | Atom Site Occupancy of O31S Constrained at       | 0.65 Check |
| PLAT300_ALERT_4_G | Atom Site Occupancy of C32S Constrained at       | 0.65 Check |
| PLAT300_ALERT_4_G | Atom Site Occupancy of H32A Constrained at       | 0.65 Check |
| PLAT300_ALERT_4_G | Atom Site Occupancy of H32B Constrained at       | 0.65 Check |
| PLAT300_ALERT_4_G | Atom Site Occupancy of H32C Constrained at       | 0.65 Check |
| PLAT300_ALERT_4_G | Atom Site Occupancy of O41S Constrained at       | 0.35 Check |
| PLAT300_ALERT_4_G | Atom Site Occupancy of C41S Constrained at       | 0.35 Check |
| PLAT300_ALERT_4_G | Atom Site Occupancy of H41A Constrained at       | 0.35 Check |
| PLAT300_ALERT_4_G | Atom Site Occupancy of H41B Constrained at       | 0.35 Check |
| PLAT300_ALERT_4_G | Atom Site Occupancy of H41C Constrained at       | 0.35 Check |
| PLAT302_ALERT_4_G | Anion/Solvent/Minor-Residue Disorder (Resd 2 )   | 100% Note  |
| PLAT302_ALERT_4_G | Anion/Solvent/Minor-Residue Disorder (Resd 3 )   | 40% Note   |

|                   |                                                    |        |       |
|-------------------|----------------------------------------------------|--------|-------|
| PLAT302_ALERT_4_G | Anion/Solvent/Minor-Residue Disorder (Resd 8 )     | 100%   | Note  |
| PLAT302_ALERT_4_G | Anion/Solvent/Minor-Residue Disorder (Resd 9 )     | 100%   | Note  |
| PLAT302_ALERT_4_G | Anion/Solvent/Minor-Residue Disorder (Resd 10 )    | 100%   | Note  |
| PLAT302_ALERT_4_G | Anion/Solvent/Minor-Residue Disorder (Resd 11 )    | 100%   | Note  |
| PLAT302_ALERT_4_G | Anion/Solvent/Minor-Residue Disorder (Resd 12 )    | 100%   | Note  |
| PLAT302_ALERT_4_G | Anion/Solvent/Minor-Residue Disorder (Resd 13 )    | 100%   | Note  |
| PLAT302_ALERT_4_G | Anion/Solvent/Minor-Residue Disorder (Resd 14 )    | 100%   | Note  |
| PLAT302_ALERT_4_G | Anion/Solvent/Minor-Residue Disorder (Resd 15 )    | 100%   | Note  |
| PLAT302_ALERT_4_G | Anion/Solvent/Minor-Residue Disorder (Resd 16 )    | 100%   | Note  |
| PLAT302_ALERT_4_G | Anion/Solvent/Minor-Residue Disorder (Resd 17 )    | 100%   | Note  |
| PLAT304_ALERT_4_G | Non-Integer Number of Atoms in ..... (Resd 2 )     | 10.50  | Check |
| PLAT304_ALERT_4_G | Non-Integer Number of Atoms in ..... (Resd 8 )     | 2.50   | Check |
| PLAT304_ALERT_4_G | Non-Integer Number of Atoms in ..... (Resd 9 )     | 3.75   | Check |
| PLAT304_ALERT_4_G | Non-Integer Number of Atoms in ..... (Resd 10 )    | 2.80   | Check |
| PLAT304_ALERT_4_G | Non-Integer Number of Atoms in ..... (Resd 11 )    | 0.81   | Check |
| PLAT304_ALERT_4_G | Non-Integer Number of Atoms in ..... (Resd 12 )    | 1.69   | Check |
| PLAT304_ALERT_4_G | Non-Integer Number of Atoms in ..... (Resd 13 )    | 2.20   | Check |
| PLAT304_ALERT_4_G | Non-Integer Number of Atoms in ..... (Resd 14 )    | 3.75   | Check |
| PLAT304_ALERT_4_G | Non-Integer Number of Atoms in ..... (Resd 15 )    | 3.75   | Check |
| PLAT304_ALERT_4_G | Non-Integer Number of Atoms in ..... (Resd 16 )    | 3.25   | Check |
| PLAT304_ALERT_4_G | Non-Integer Number of Atoms in ..... (Resd 17 )    | 1.75   | Check |
| PLAT606_ALERT_4_G | VERY LARGE Solvent Accessible VOID(S) in Structure | !      | Info  |
| PLAT779_ALERT_4_G | Suspect or Irrelevant (Bond) Angle(s) in CIF . #   | 779    | Check |
|                   | B91 -F92 -B91 2.656 1.555 1.555                    | 29.90  | Deg.  |
| PLAT779_ALERT_4_G | Suspect or Irrelevant (Bond) Angle(s) in CIF . #   | 780    | Check |
|                   | B91 -F93 -B91 1.555 1.555 2.656                    | 32.90  | Deg.  |
| PLAT789_ALERT_4_G | Atoms with Negative _atom_site_disorder_group #    | 20     | Check |
| PLAT794_ALERT_5_G | Tentative Bond Valency for Co1 (II) .              | 1.81   | Info  |
| PLAT794_ALERT_5_G | Tentative Bond Valency for Co2 (II) .              | 1.85   | Info  |
| PLAT794_ALERT_5_G | Tentative Bond Valency for Co3 (II) .              | 1.86   | Info  |
| PLAT794_ALERT_5_G | Tentative Bond Valency for Co4 (II) .              | 1.83   | Info  |
| PLAT802_ALERT_4_G | CIF Input Record(s) with more than 80 Characters   | 5      | Info  |
| PLAT860_ALERT_3_G | Number of Least-Squares Restraints .....           | 6651   | Note  |
| PLAT869_ALERT_4_G | ALERTS Related to the Use of SQUEEZE Suppressed    | !      | Info  |
| PLAT910_ALERT_3_G | Missing # of FCF Reflection(s) Below Theta(Min).   | 2      | Note  |
| PLAT912_ALERT_4_G | Missing # of FCF Reflections Above STh/L= 0.600    | 20     | Note  |
| PLAT933_ALERT_2_G | Number of OMIT Records in Embedded .res File ...   | 36     | Note  |
| PLAT984_ALERT_1_G | The Co-f' = 0.3538 Deviates from the B&C-Value     | 0.3480 | Check |
| PLAT985_ALERT_1_G | The Co-f" = 0.9121 Deviates from the B&C-Value     | 0.9239 | Check |
| PLAT992_ALERT_5_G | Repd & Actual _reflns_number_gt Values Differ by   | 1      | Check |

---

0 **ALERT level A** = Most likely a serious problem - resolve or explain  
 0 **ALERT level B** = A potentially serious problem, consider carefully  
 17 **ALERT level C** = Check. Ensure it is not caused by an omission or oversight  
 116 **ALERT level G** = General information/check it is not something unexpected

9 ALERT type 1 CIF construction/syntax error, inconsistent or missing data  
 18 ALERT type 2 Indicator that the structure model may be wrong or deficient  
 6 ALERT type 3 Indicator that the structure quality may be low  
 95 ALERT type 4 Improvement, methodology, query or suggestion  
 5 ALERT type 5 Informative message, check

---

It is advisable to attempt to resolve as many as possible of the alerts in all categories. Often the minor alerts point to easily fixed oversights, errors and omissions in your CIF or refinement strategy, so attention to these fine details can be worthwhile. In order to resolve some of the more serious problems it may be necessary to carry out additional measurements or structure refinements. However, the purpose of your study may justify the reported deviations and the more serious of these should normally be commented upon in the discussion or experimental section of a paper or in the "special\_details" fields of the CIF. checkCIF was carefully designed to identify outliers and unusual parameters, but every test has its limitations and alerts that are not important in a particular case may appear. Conversely, the absence of alerts does not guarantee there are no aspects of the results needing attention. It is up to the individual to critically assess their own results and, if necessary, seek expert advice.

### **Publication of your CIF in IUCr journals**

A basic structural check has been run on your CIF. These basic checks will be run on all CIFs submitted for publication in IUCr journals (*Acta Crystallographica*, *Journal of Applied Crystallography*, *Journal of Synchrotron Radiation*); however, if you intend to submit to *Acta Crystallographica Section C* or *E* or *IUCrData*, you should make sure that full publication checks are run on the final version of your CIF prior to submission.

### **Publication of your CIF in other journals**

Please refer to the *Notes for Authors* of the relevant journal for any special instructions relating to CIF submission.

---

**PLATON version of 22/12/2019; check.def file version of 13/12/2019**

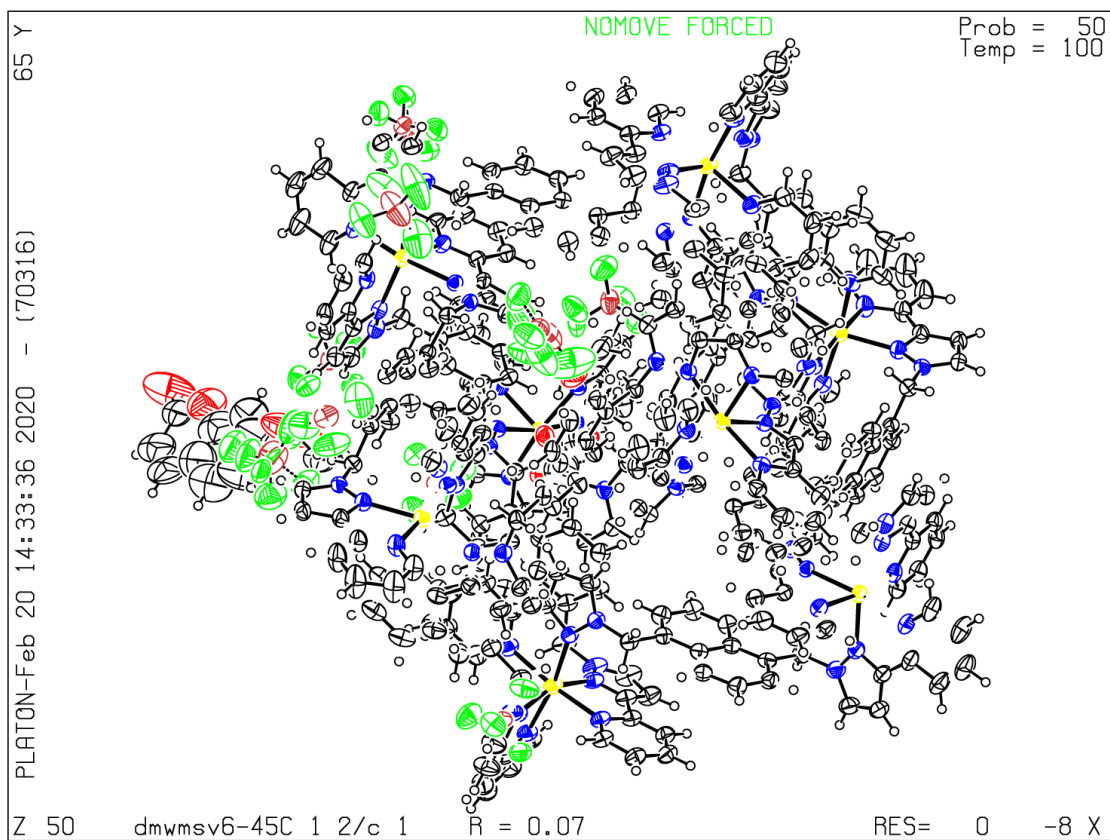

Supplement: s1 [file s1]
