# Supplementary material
Source: MDPI journal article supplement (https://www.mdpi.com/2624-8549/2/2/31)

# checkCIF/PLATON report

Structure factors have been supplied for datablock(s) dmwmsv3-130\_f56\_pydisulph\_sq

THIS REPORT IS FOR GUIDANCE ONLY. IF USED AS PART OF A REVIEW PROCEDURE FOR PUBLICATION, IT SHOULD NOT REPLACE THE EXPERTISE OF AN EXPERIENCED CRYSTALLOGRAPHIC REFEREE.

No syntax errors found.      CIF dictionary      Interpreting this report

## Datablock: dmwmsv3-130\_f56\_pydisulph\_sq

---

|                 |                                                                       |                                                                      |
|-----------------|-----------------------------------------------------------------------|----------------------------------------------------------------------|
| Bond precision: | C-C = 0.0034 A                                                        | Wavelength=0.68890                                                   |
| Cell:           | a=32.81236(7)      b=30.21497(6)      c=40.09564(8)                   |                                                                      |
|                 | alpha=90      beta=96.3312(2)      gamma=90                           |                                                                      |
| Temperature:    | 100 K                                                                 |                                                                      |
|                 | Calculated                                                            | Reported                                                             |
| Volume          | 39509.35(14)                                                          | 39509.35(10)                                                         |
| Space group     | C 2/c                                                                 | C 1 2/c 1                                                            |
| Hall group      | -C 2yc                                                                | -C 2yc                                                               |
| Moiety formula  | C336 H264 Co8 N72,<br>0.554(C10 H8 N2 S2), B2<br>F5, 14(B F4), 2.446( | C336 H264 Co8 N72,<br>0.55(C10 H8 N2 S2), 14(B<br>F4), B2 F5, 2.45(C |
| Sum formula     | C343.98 H278.22 B16 Co8<br>F61 N73.11 O2.45 S1.11 [+<br>solvent]      | C380.04 H422.24 B16 Co8<br>F64 N73.12 O38.44 S1.12                   |
| Mr              | 7314.00                                                               | 8525.63                                                              |
| Dx,g cm-3       | 1.230                                                                 | 1.433                                                                |
| Z               | 4                                                                     | 4                                                                    |
| Mu (mm-1)       | 0.385                                                                 | 0.411                                                                |
| F000            | 14944.7                                                               | 17647.0                                                              |
| F000'           | 14962.77                                                              |                                                                      |
| h,k,lmax        | 47,43,58                                                              | 47,43,58                                                             |
| Nref            | 62996                                                                 | 62848                                                                |
| Tmin,Tmax       |                                                                       | 0.986,1.000                                                          |
| Tmin'           |                                                                       |                                                                      |

Correction method= # Reported T Limits: Tmin=0.986 Tmax=1.000  
AbsCorr = EMPIRICAL

Data completeness= 0.998      Theta(max)= 29.947

R(reflections)= 0.0672( 42312)      wR2(reflections)= 0.2358( 62848)

S = 1.098      Npar= 2425

---

The following ALERTS were generated. Each ALERT has the format

**test-name\_ALERT\_alert-type\_alert-level.**

Click on the hyperlinks for more details of the test.

---

### ● Alert level C

|                   |                                                  |              |
|-------------------|--------------------------------------------------|--------------|
| PLAT077_ALERT_4_C | Unitcell Contains Non-integer Number of Atoms .. | Please Check |
| PLAT250_ALERT_2_C | Large U3/U1 Ratio for Average U(i,j) Tensor .... | 2.4 Note     |
| PLAT260_ALERT_2_C | Large Average Ueq of Residue Including F92       | 0.110 Check  |
| PLAT260_ALERT_2_C | Large Average Ueq of Residue Including F52       | 0.147 Check  |
| PLAT260_ALERT_2_C | Large Average Ueq of Residue Including F72       | 0.147 Check  |
| PLAT260_ALERT_2_C | Large Average Ueq of Residue Including F82       | 0.122 Check  |
| PLAT911_ALERT_3_C | Missing FCF Refl Between Thmin & STh/L= 0.600    | 92 Report    |
| PLAT913_ALERT_3_C | Missing # of Very Strong Reflections in FCF .... | 5 Note       |
| PLAT918_ALERT_3_C | Reflection(s) with I(obs) much Smaller I(calc) . | 5 Check      |
| PLAT934_ALERT_3_C | Number of (Iobs-Icalc)/Sigma(W) > 10 Outliers .. | 1 Check      |

---

### ● Alert level G

FORMU01\_ALERT\_1\_G There is a discrepancy between the atom counts in the  
\_chemical\_formula\_sum and \_chemical\_formula\_moiety. This is  
usually due to the moiety formula being in the wrong format.  
Atom count from \_chemical\_formula\_sum: C380.0400 H422.2400 B16 Co8 F  
Atom count from \_chemical\_formula\_moiety:C343.95 H278.2 B16 Co8 F61 N7

FORMU01\_ALERT\_2\_G There is a discrepancy between the atom counts in the  
\_chemical\_formula\_sum and the formula from the \_atom\_site\* data.  
Atom count from \_chemical\_formula\_sum:C380.0400 H422.2400 B16 Co8 F64  
Atom count from the \_atom\_site data: C343.9842 H278.2151 B16 Co8 F61

ABSMU01\_ALERT\_1\_G Calculation of \_exptl\_absorpt\_correction\_mu  
not performed for this radiation type.

CELLZ01\_ALERT\_1\_G Difference between formula and atom\_site contents detected.

CELLZ01\_ALERT\_1\_G ALERT: Large difference may be due to a  
symmetry error - see SYMMG tests  
From the CIF: \_cell\_formula\_units\_Z 4  
From the CIF: \_chemical\_formula\_sum C380.04 H422.24 B16 Co8 F64 N73.12  
TEST: Compare cell contents of formula and atom\_site data

| atom | Z*formula | cif sites | diff   |
|------|-----------|-----------|--------|
| C    | 1520.16   | 1375.94   | 144.22 |
| H    | 1688.96   | 1112.86   | 576.10 |
| B    | 64.00     | 64.00     | 0.00   |
| Co   | 32.00     | 32.00     | 0.00   |
| F    | 256.00    | 244.00    | 12.00  |
| N    | 292.48    | 292.43    | 0.05   |
| O    | 153.76    | 9.78      | 143.98 |
| S    | 4.48      | 4.43      | 0.05   |

|                   |                                                  |               |
|-------------------|--------------------------------------------------|---------------|
| PLAT002_ALERT_2_G | Number of Distance or Angle Restraints on AtSite | 247 Note      |
| PLAT003_ALERT_2_G | Number of Uiso or Uij Restrained non-H Atoms ... | 270 Report    |
| PLAT007_ALERT_5_G | Number of Unrefined Donor-H Atoms .....          | 2 Report      |
| PLAT014_ALERT_1_G | N.O.K. _shelx_fab_checksum Found in CIF .....    | Please Check  |
| PLAT041_ALERT_1_G | Calc. and Reported SumFormula Strings Differ     | Please Check  |
| PLAT042_ALERT_1_G | Calc. and Reported MoietyFormula Strings Differ  | Please Check  |
| PLAT072_ALERT_2_G | SHELXL First Parameter in WGHT Unusually Large   | 0.14 Report   |
| PLAT092_ALERT_4_G | Check: Wavelength Given is not Cu,Ga,Mo,Ag,In Ka | 0.68890 Ang.  |
| PLAT142_ALERT_4_G | s.u. on b - Axis Small or Missing .....          | 0.00006 Ang.  |
| PLAT143_ALERT_4_G | s.u. on c - Axis Small or Missing .....          | 0.00008 Ang.  |
| PLAT145_ALERT_4_G | s.u. on beta Small or Missing .....              | 0.0002 Degree |
| PLAT152_ALERT_1_G | The Supplied and Calc. Volume s.u. Differ by ... | 4 Units       |
| PLAT171_ALERT_4_G | The CIF-Embedded .res File Contains EADP Records | 1 Report      |
| PLAT172_ALERT_4_G | The CIF-Embedded .res File Contains DFIX Records | 1 Report      |

|                   |                                                    |             |
|-------------------|----------------------------------------------------|-------------|
| PLAT174_ALERT_4_G | The CIF-Embedded .res File Contains FLAT Records   | 2 Report    |
| PLAT175_ALERT_4_G | The CIF-Embedded .res File Contains SAME Records   | 36 Report   |
| PLAT178_ALERT_4_G | The CIF-Embedded .res File Contains SIMU Records   | 1 Report    |
| PLAT186_ALERT_4_G | The CIF-Embedded .res File Contains ISOR Records   | 1 Report    |
| PLAT187_ALERT_4_G | The CIF-Embedded .res File Contains RIGU Records   | 2 Report    |
| PLAT244_ALERT_4_G | Low Solvent Ueq as Compared to Neighbors of        | B11 Check   |
| PLAT244_ALERT_4_G | Low Solvent Ueq as Compared to Neighbors of        | B21 Check   |
| PLAT244_ALERT_4_G | Low Solvent Ueq as Compared to Neighbors of        | B31 Check   |
| PLAT244_ALERT_4_G | Low Solvent Ueq as Compared to Neighbors of        | B41 Check   |
| PLAT244_ALERT_4_G | Low Solvent Ueq as Compared to Neighbors of        | B51 Check   |
| PLAT244_ALERT_4_G | Low Solvent Ueq as Compared to Neighbors of        | B71 Check   |
| PLAT300_ALERT_4_G | Atom Site Occupancy of F62 Constrained at          | 0.5 Check   |
| PLAT300_ALERT_4_G | Atom Site Occupancy of F63 Constrained at          | 0.5 Check   |
| PLAT300_ALERT_4_G | Atom Site Occupancy of F64 Constrained at          | 0.5 Check   |
| PLAT300_ALERT_4_G | Atom Site Occupancy of F65 Constrained at          | 0.5 Check   |
| PLAT300_ALERT_4_G | Atom Site Occupancy of B61 Constrained at          | 0.5 Check   |
| PLAT300_ALERT_4_G | Atom Site Occupancy of F82 Constrained at          | 0.5 Check   |
| PLAT300_ALERT_4_G | Atom Site Occupancy of F83 Constrained at          | 0.5 Check   |
| PLAT300_ALERT_4_G | Atom Site Occupancy of F84 Constrained at          | 0.5 Check   |
| PLAT300_ALERT_4_G | Atom Site Occupancy of F85 Constrained at          | 0.5 Check   |
| PLAT300_ALERT_4_G | Atom Site Occupancy of B81 Constrained at          | 0.5 Check   |
| PLAT300_ALERT_4_G | Atom Site Occupancy of O41S Constrained at         | 0.5 Check   |
| PLAT300_ALERT_4_G | Atom Site Occupancy of C42S Constrained at         | 0.5 Check   |
| PLAT300_ALERT_4_G | Atom Site Occupancy of H41S Constrained at         | 0.5 Check   |
| PLAT300_ALERT_4_G | Atom Site Occupancy of H42A Constrained at         | 0.5 Check   |
| PLAT300_ALERT_4_G | Atom Site Occupancy of H42B Constrained at         | 0.5 Check   |
| PLAT300_ALERT_4_G | Atom Site Occupancy of H42C Constrained at         | 0.5 Check   |
| PLAT302_ALERT_4_G | Anion/Solvent/Minor-Residue Disorder (Resd 2 )     | 100% Note   |
| PLAT302_ALERT_4_G | Anion/Solvent/Minor-Residue Disorder (Resd 9 )     | 100% Note   |
| PLAT302_ALERT_4_G | Anion/Solvent/Minor-Residue Disorder (Resd 11 )    | 100% Note   |
| PLAT302_ALERT_4_G | Anion/Solvent/Minor-Residue Disorder (Resd 12 )    | 100% Note   |
| PLAT302_ALERT_4_G | Anion/Solvent/Minor-Residue Disorder (Resd 13 )    | 100% Note   |
| PLAT304_ALERT_4_G | Non-Integer Number of Atoms in ..... (Resd 2 )     | 6.09 Check  |
| PLAT304_ALERT_4_G | Non-Integer Number of Atoms in ..... (Resd 9 )     | 2.50 Check  |
| PLAT304_ALERT_4_G | Non-Integer Number of Atoms in ..... (Resd 11 )    | 2.50 Check  |
| PLAT304_ALERT_4_G | Non-Integer Number of Atoms in ..... (Resd 12 )    | 4.34 Check  |
| PLAT411_ALERT_2_G | Short Inter H...H Contact H23A ..H15G .            | 2.00 Ang.   |
|                   | 3/2-x,1/2-y,2-z =                                  | 7_657 Check |
| PLAT411_ALERT_2_G | Short Inter H...H Contact H53C ..H25G .            | 2.07 Ang.   |
|                   | 3/2-x,1/2-y,2-z =                                  | 7_657 Check |
| PLAT432_ALERT_2_G | Short Inter X...Y Contact F75 ..C24G               | 2.93 Ang.   |
|                   | x,y,z =                                            | 1_555 Check |
| PLAT606_ALERT_4_G | VERY LARGE Solvent Accessible VOID(S) in Structure | ! Info      |
| PLAT779_ALERT_4_G | Suspect or Irrelevant (Bond) Angle(s) in CIF . #   | 509 Check   |
|                   | B91 -F93 -B91 1.555 1.555 2.657                    | 32.60 Deg.  |
| PLAT779_ALERT_4_G | Suspect or Irrelevant (Bond) Angle(s) in CIF . #   | 510 Check   |
|                   | B91 -F94 -B91 2.657 1.555 1.555                    | 29.30 Deg.  |
| PLAT789_ALERT_4_G | Atoms with Negative _atom_site_disorder_group #    | 34 Check    |
| PLAT790_ALERT_4_G | Centre of Gravity not Within Unit Cell: Resd. #    | 3 Note      |
|                   | B2 F5                                              |             |
| PLAT790_ALERT_4_G | Centre of Gravity not Within Unit Cell: Resd. #    | 6 Note      |
|                   | B F4                                               |             |
| PLAT790_ALERT_4_G | Centre of Gravity not Within Unit Cell: Resd. #    | 8 Note      |
|                   | B F4                                               |             |
| PLAT790_ALERT_4_G | Centre of Gravity not Within Unit Cell: Resd. #    | 9 Note      |
|                   | B F4                                               |             |
| PLAT790_ALERT_4_G | Centre of Gravity not Within Unit Cell: Resd. #    | 10 Note     |
|                   | B F4                                               |             |
| PLAT790_ALERT_4_G | Centre of Gravity not Within Unit Cell: Resd. #    | 11 Note     |
|                   | B F4                                               |             |
| PLAT794_ALERT_5_G | Tentative Bond Valency for Co1 (II) .              | 1.81 Info   |
| PLAT794_ALERT_5_G | Tentative Bond Valency for Co2 (II) .              | 1.85 Info   |

|                   |                                                  |        |                             |        |             |
|-------------------|--------------------------------------------------|--------|-----------------------------|--------|-------------|
| PLAT794_ALERT_5_G | Tentative Bond Valency for Co3                   | (II)   | .                           | 1.85   | Info        |
| PLAT794_ALERT_5_G | Tentative Bond Valency for Co4                   | (II)   | .                           | 1.83   | Info        |
| PLAT802_ALERT_4_G | CIF Input Record(s) with more than 80 Characters |        |                             | 3      | Info        |
| PLAT860_ALERT_3_G | Number of Least-Squares Restraints               | .....  |                             | 6404   | Note        |
| PLAT869_ALERT_4_G | ALERTS Related to the Use of SQUEEZE Suppressed  |        |                             | !      | Info        |
| PLAT883_ALERT_1_G | No Info/Value for _atom_sites_solution_primary   |        |                             |        | Please Do ! |
| PLAT910_ALERT_3_G | Missing # of FCF Reflection(s) Below Theta(Min). |        |                             | 2      | Note        |
| PLAT912_ALERT_4_G | Missing # of FCF Reflections Above STh/L=        | 0.600  |                             | 56     | Note        |
| PLAT933_ALERT_2_G | Number of OMIT Records in Embedded .res File     | ...    |                             | 34     | Note        |
| PLAT978_ALERT_2_G | Number C-C Bonds with Positive Residual Density. |        |                             | 2      | Info        |
| PLAT984_ALERT_1_G | The Co-f' =                                      | 0.3538 | Deviates from the B&C-Value | 0.3480 | Check       |
| PLAT984_ALERT_1_G | The S-f' =                                       | 0.1246 | Deviates from the B&C-Value | 0.1187 | Check       |
| PLAT985_ALERT_1_G | The Co-f" =                                      | 0.9121 | Deviates from the B&C-Value | 0.9239 | Check       |
| PLAT985_ALERT_1_G | The S-f" =                                       | 0.1234 | Deviates from the B&C-Value | 0.1169 | Check       |

---

0 **ALERT level A** = Most likely a serious problem - resolve or explain  
 0 **ALERT level B** = A potentially serious problem, consider carefully  
 10 **ALERT level C** = Check. Ensure it is not caused by an omission or oversight  
 84 **ALERT level G** = General information/check it is not something unexpected

13 ALERT type 1 CIF construction/syntax error, inconsistent or missing data  
 14 ALERT type 2 Indicator that the structure model may be wrong or deficient  
 6 ALERT type 3 Indicator that the structure quality may be low  
 56 ALERT type 4 Improvement, methodology, query or suggestion  
 5 ALERT type 5 Informative message, check

---

It is advisable to attempt to resolve as many as possible of the alerts in all categories. Often the minor alerts point to easily fixed oversights, errors and omissions in your CIF or refinement strategy, so attention to these fine details can be worthwhile. In order to resolve some of the more serious problems it may be necessary to carry out additional measurements or structure refinements. However, the purpose of your study may justify the reported deviations and the more serious of these should normally be commented upon in the discussion or experimental section of a paper or in the "special\_details" fields of the CIF. checkCIF was carefully designed to identify outliers and unusual parameters, but every test has its limitations and alerts that are not important in a particular case may appear. Conversely, the absence of alerts does not guarantee there are no aspects of the results needing attention. It is up to the individual to critically assess their own results and, if necessary, seek expert advice.

### Publication of your CIF in IUCr journals

A basic structural check has been run on your CIF. These basic checks will be run on all CIFs submitted for publication in IUCr journals (*Acta Crystallographica*, *Journal of Applied Crystallography*, *Journal of Synchrotron Radiation*); however, if you intend to submit to *Acta Crystallographica Section C* or *E* or *IUCrData*, you should make sure that full publication checks are run on the final version of your CIF prior to submission.

### Publication of your CIF in other journals

Please refer to the *Notes for Authors* of the relevant journal for any special instructions relating to CIF submission.

PLATON version of 22/12/2019; check.def file version of 13/12/2019

Datablock dmwmsv3-130\_f56\_pydisulph\_sq - ellipsoid plot

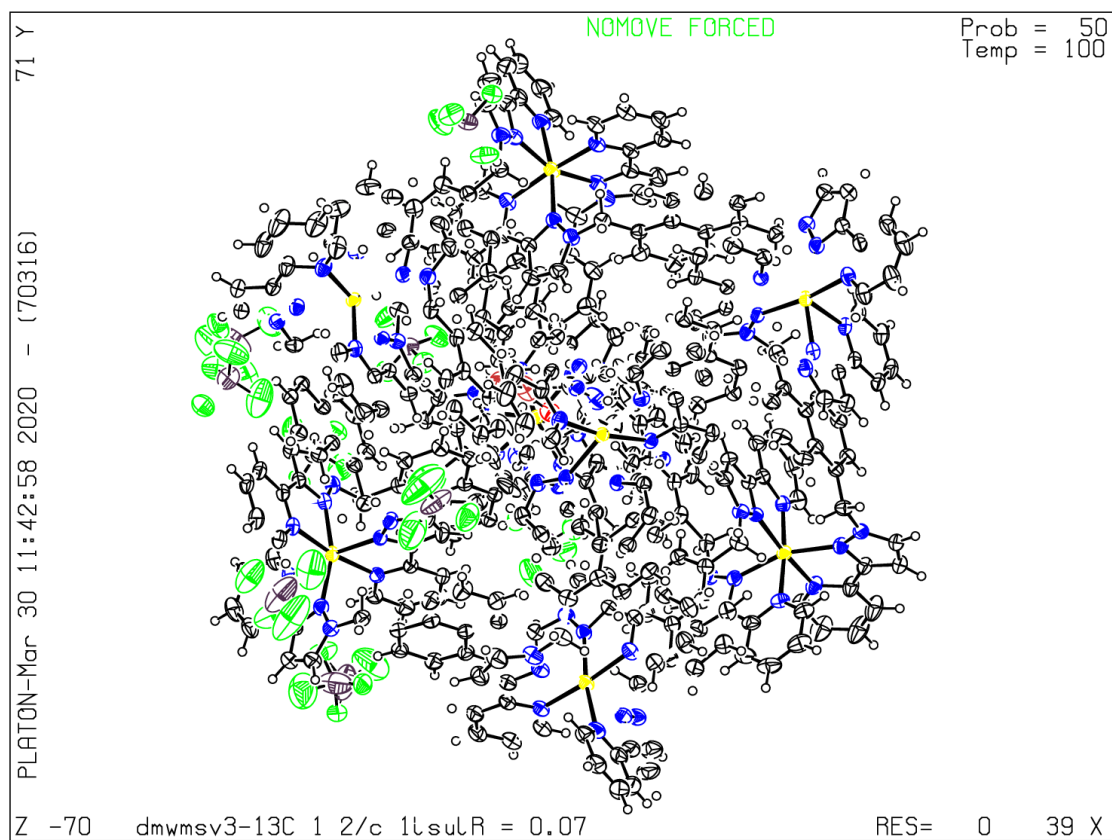

Supplement: s1 [file s1]
